# Supplementary material for: In situ polymerisation of isoeugenol as a green consolidation method for waterlogged archaeological wood
Source: PubMed Central journal article supplement (PMC5406834; doi:10.1038/srep46481), 2017-04-27
Supplement: srep46481-s1.pdf [file srep46481-s1.pdf]

# ***In situ* polymerisation of isoeugenol as a green consolidation method for waterlogged archaeological wood – Supplementary Information**

Emily McHale\*,<sup>a,b</sup> Calin C. Steindal,<sup>a</sup> Hartmut Kutzke,<sup>a</sup> Tore Benneche<sup>b</sup> and Stephen E. Harding\*<sup>c</sup>

<sup>a</sup> Museum of Cultural History, University of Oslo, Postbox 6762 St. Olavs plass, 0130 Oslo, Norway

<sup>b</sup> Department of Chemistry, University of Oslo, Postbox 1033 Blindern, 0315 Oslo, Norway

<sup>c</sup> National Centre for Macromolecular Hydrodynamics, University of Nottingham, Sutton Bonington, LE12 5RD, United Kingdom

\*Corresponding authors: email: [emily.mchale@khm.uio.no](mailto:emily.mchale@khm.uio.no), [steve.harding@nottingham.ac.uk](mailto:steve.harding@nottingham.ac.uk)

## **ATR-FTIR spectra for all samples: Figs. S1-S3**

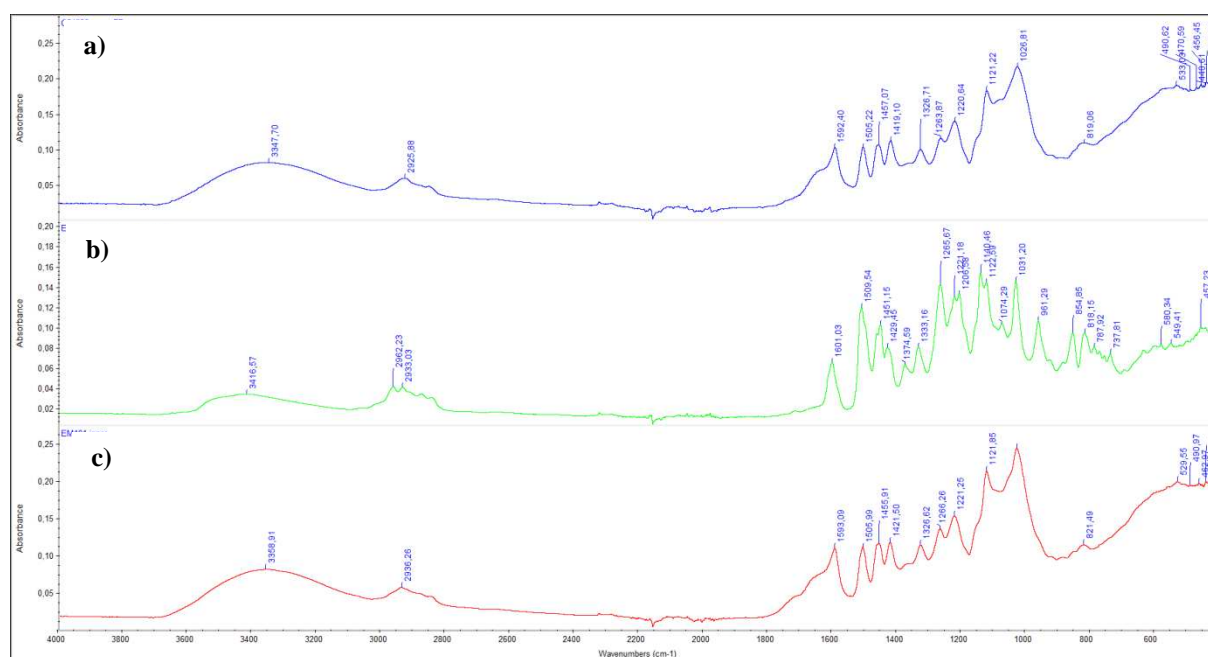

**Figure S1:** ATR-FTIR spectra of **IE2** with **a)** untreated reference, **b)** polymerised material, **c)** centre of treated sample. The emergence of a band at 1725 cm<sup>-1</sup> can be seen in **c** showing the presence of **IE2** in the centre of the wood.

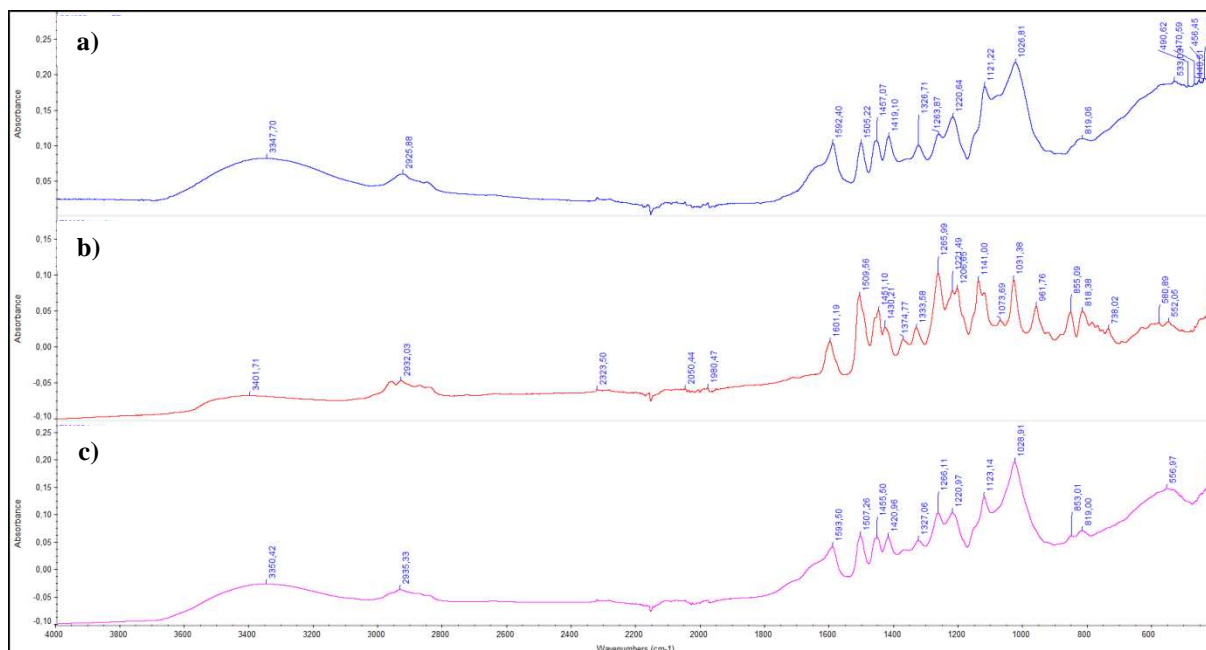

**Figure S2:** ATR-FTIR of **IE3** with **a)** untreated reference, **b)** polymerised material, **c)** centre of treated sample. The emergence of a band at  $1725\text{ cm}^{-1}$  can be seen in **c** showing the presence of **IE3** in the centre of the wood.

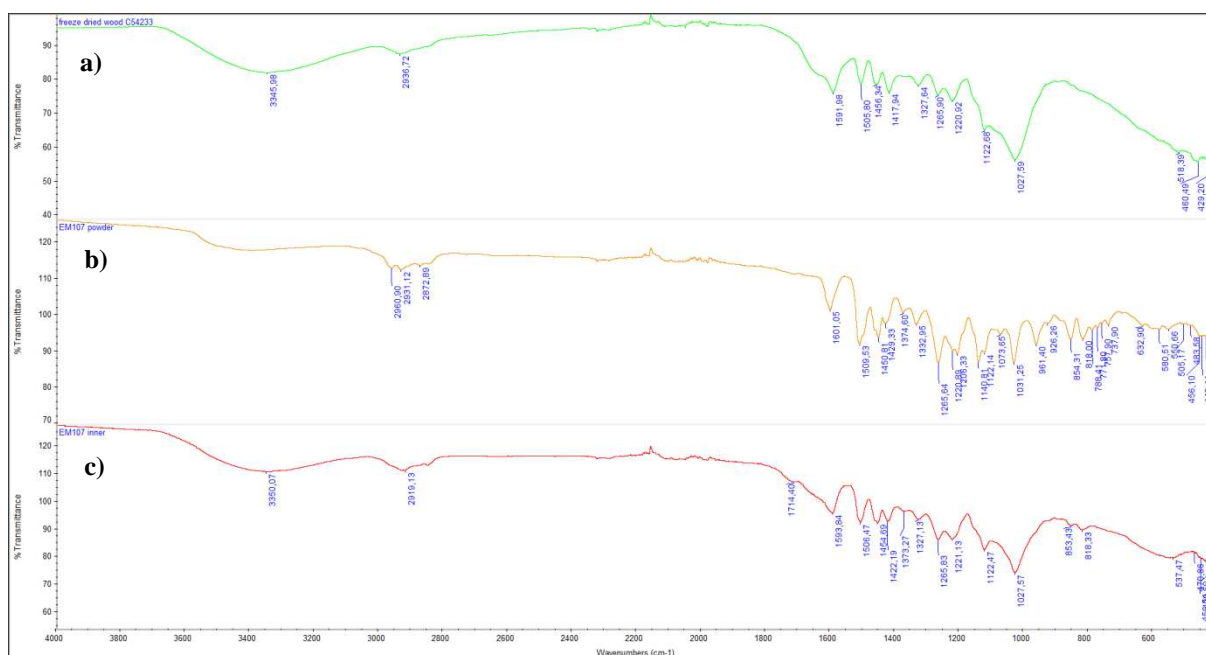

**Figure S3:** ATR-FTIR of **IE4** with **a)** untreated reference, **b)** polymerised material, **c)** centre of treated sample. The emergence of a band at  $1725\text{ cm}^{-1}$  can be seen in **c** showing the presence of **IE3** in the centre of the wood.

**SEM images of cross-sections of all samples (treated and untreated): Figs. S4-S6**

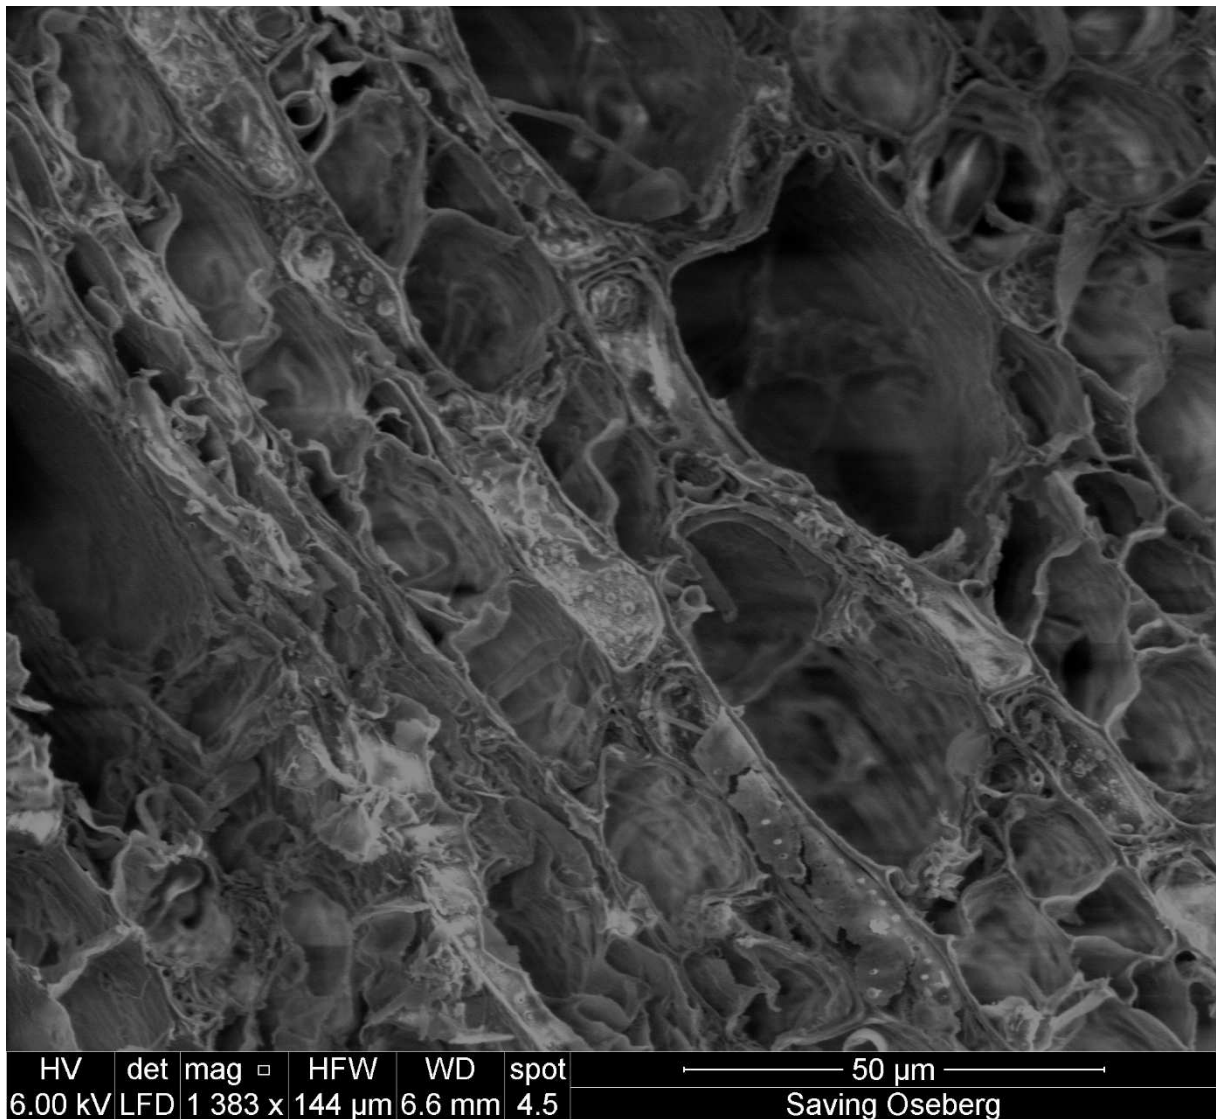

**Figure S4:** SEM image of a cross-section of **IE2** after treatment. The image shows that the wood structure remains open and that **IE2** is not filling the pores of the wood meaning it would be possible to retreat the sample if needed in the future.

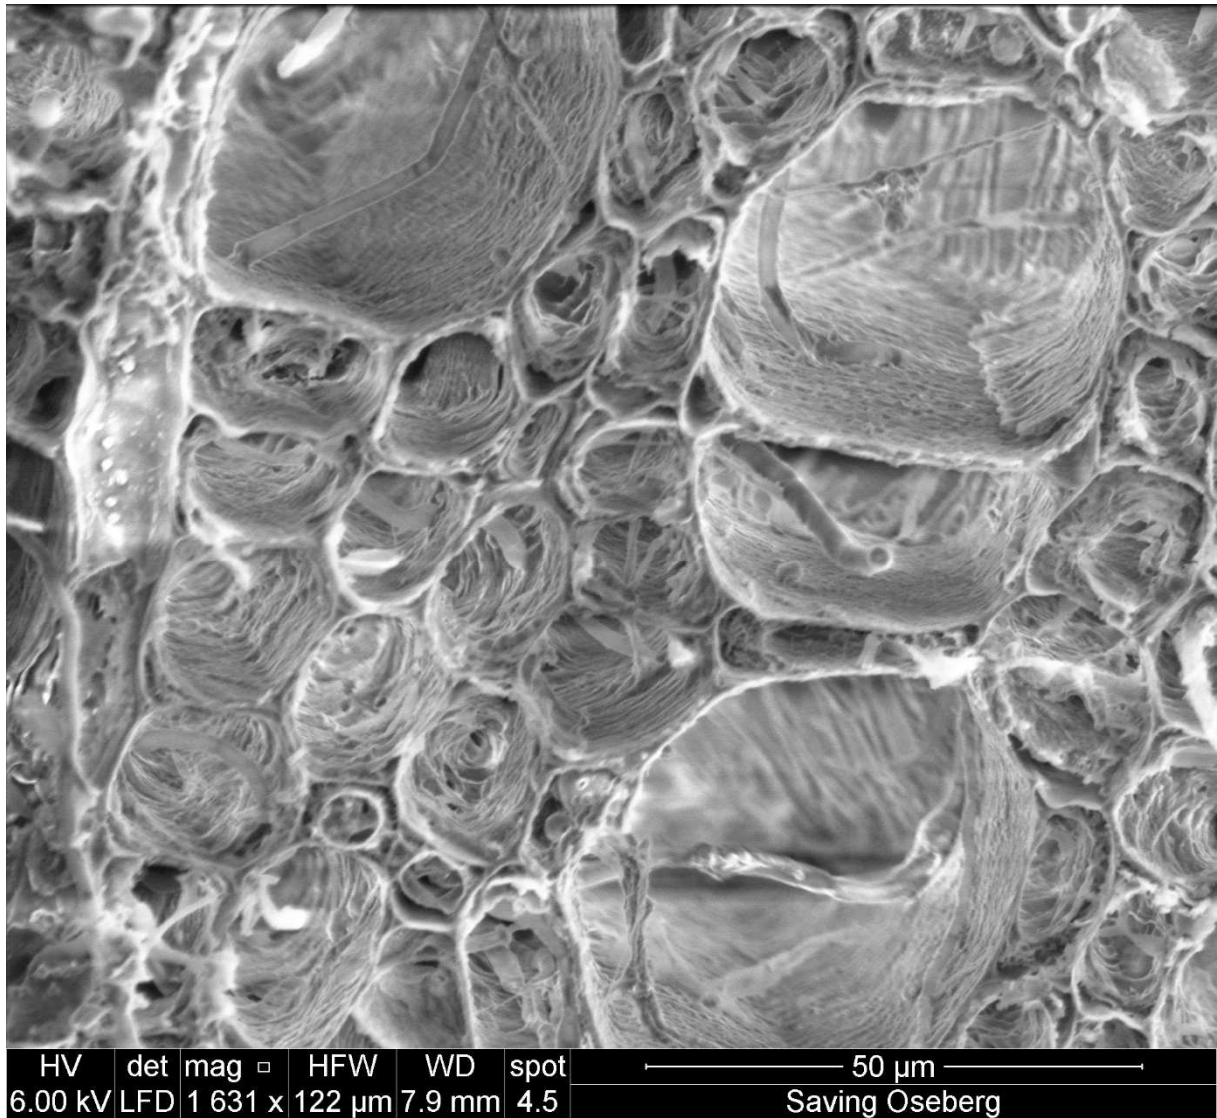

**Figure S5:** SEM image of a cross-section of **IE3** after treatment. The image shows that the wood structure remains open and that **IE3** is not filling the pores of the wood meaning it would be possible to retreat the sample if needed in the future.

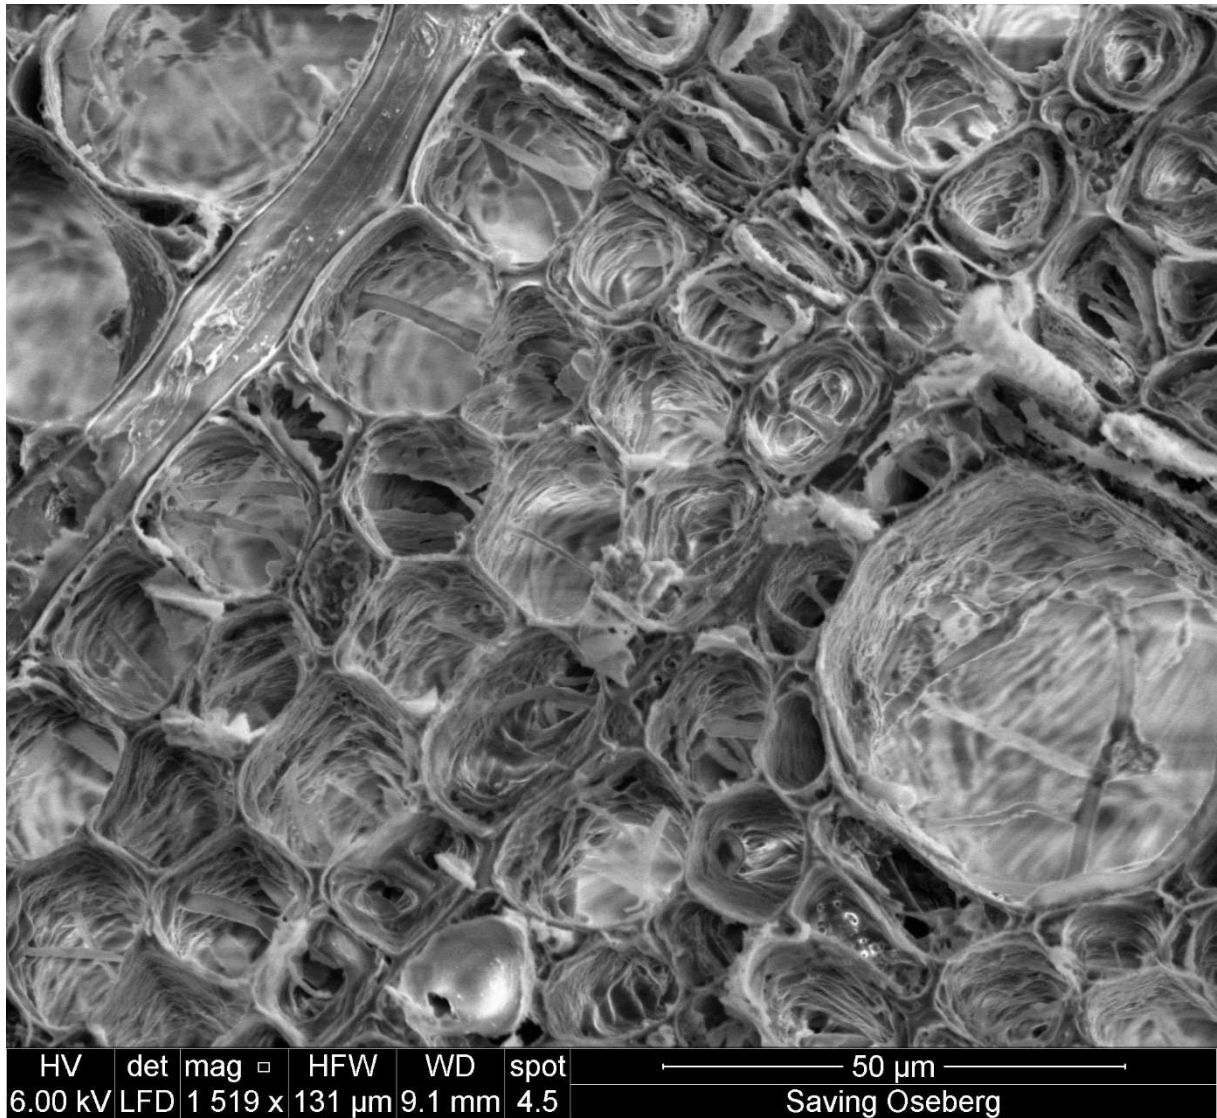

**Figure S6:** SEM image of a cross-section of **IE4** after treatment. The image shows that the wood structure remains open and that **IE4** is not filling the pores of the wood meaning it would be possible to retreat the sample if needed in the future.
